# Supplementary material for: Research on Sequence Construction and Characteristics Diagnosis of Droughts and Floods in the Qinling Mountains of China From 1850 to 1959
Source: Frontiers journal article supplement (doi:10.3389/feart.2022.860750), 2022-06-23
Supplement: Table_5.XLSX [file Table_5.XLSX]

## Sheet: Sheet1
Year	sliding statistic
1859	-0.46569	2.101	-2.101	-0.3125
1860	-0.700649	2.101	-2.101	0
1861	-1.5787	2.101	-2.101	0.03125
1862	-2.63493	2.101	-2.101	-1.21875	-2.63493
1863	-2.28831	2.101	-2.101	1.4375	-2.28831
1864	-3.12772	2.101	-2.101	-0.0625	-3.12772
1865	-2.49615	2.101	-2.101	-0.15625	-2.49615
1866	-1.82093	2.101	-2.101	-0.40625
1867	0	2.101	-2.101	2
1868	1.21356	2.101	-2.101	1.75
1869	1.67216	2.101	-2.101	0.84375
1870	2.18797	2.101	-2.101	0.8125	2.18797
1871	2.79414	2.101	-2.101	1	2.79414
1872	2.84605	2.101	-2.101	0.09375	2.84605
1873	1.83288	2.101	-2.101	0.0625
1874	1.72497	2.101	-2.101	0.96875
1875	1.29987	2.101	-2.101	-0.9375
1876	0.717137	2.101	-2.101	-0.96875
1877	-0.557086	2.101	-2.101	-2
1878	-2.16506	2.101	-2.101	-1.84375	-2.16506
1879	-2.89885	2.101	-2.101	0	-2.89885
1880	-3.27965	2.101	-2.101	0.0625	-3.27965
1881	-3.18401	2.101	-2.101	-0.09375	-3.18401
1882	-2.80728	2.101	-2.101	0.96875	-2.80728
1883	-1.75384	2.101	-2.101	1.625
1884	-1.32026	2.101	-2.101	1.71875
1885	-1.35273	2.101	-2.101	0.375
1886	-0.974355	2.101	-2.101	0.75
1887	-0.439941	2.101	-2.101	0.875
1888	0	2.101	-2.101	0.90625
1889	1.24568	2.101	-2.101	1.625
1890	1.48123	2.101	-2.101	0.375
1891	1.18688	2.101	-2.101	-0.90625
1892	1.4	2.101	-2.101	-0.3125
1893	0.574989	2.101	-2.101	0.0625
1894	0.6	2.101	-2.101	0.90625
1895	1.01827	2.101	-2.101	1
1896	1.01827	2.101	-2.101	1.125
1897	1.24212	2.101	-2.101	1.09375
1898	2.10111	2.101	-2.101	1.90625	2.10111
1899	0.86155	2.101	-2.101	-1.03125
1900	-0.399114	2.101	-2.101	-2
1901	-0.844317	2.101	-2.101	-1
1902	-0.80904	2.101	-2.101	0.125
1903	0	2.101	-2.101	1.67742
1904	-0.399114	2.101	-2.101	0.125
1905	-0.180253	2.101	-2.101	0.3125
1906	0	2.101	-2.101	0.96875
1907	-0.365148	2.101	-2.101	0
1908	-0.982683	2.101	-2.101	0.46875
1909	-0.191663	2.101	-2.101	1.03125
1910	1.29232	2.101	-2.101	1.5
1911	1.84072	2.101	-2.101	1.09375
1912	1.51161	2.101	-2.101	-1
1913	0.884652	2.101	-2.101	0.46875
1914	1.56092	2.101	-2.101	0.5
1915	0.414039	2.101	-2.101	-1.96875
1916	0	2.101	-2.101	-0.3125
1917	0.605406	2.101	-2.101	0.84375
1918	1.34164	2.101	-2.101	0.875
1919	1.07571	2.101	-2.101	-0.90625
1920	0.565825	2.101	-2.101	-0.71875
1921	0.565825	2.101	-2.101	1.4375
1922	0.379473	2.101	-2.101	-0.96875
1923	0.557086	2.101	-2.101	0.75
1924	0	2.101	-2.101	-0.84375
1925	1.02778	2.101	-2.101	1.3125
1926	1.69706	2.101	-2.101	-0.0967742
1927	0.801784	2.101	-2.101	-1.1875
1928	-0.395628	2.101	-2.101	-2
1929	-0.801784	2.101	-2.101	-2
1930	-1.02778	2.101	-2.101	-1.03125
1931	-0.61667	2.101	-2.101	0.9375
1932	-0.203653	2.101	-2.101	0.09375
1933	-0.203653	2.101	-2.101	0.6875
1934	0.203653	2.101	-2.101	0.3125
1935	-0.424264	2.101	-2.101	0.46875
1936	-1.14043	2.101	-2.101	-0.84375
1937	-0.447214	2.101	-2.101	0.8125
1938	0.489898	2.101	-2.101	1.375
1939	0	2.101	-2.101	-0.59375
1940	0.477334	2.101	-2.101	0.46875
1941	-0.24577	2.101	-2.101	-1.29032
1942	-0.973329	2.101	-2.101	-0.875
1943	-0.747409	2.101	-2.101	0.65625
1944	-1.51053	2.101	-2.101	-0.71875
1945	-1.52128	2.101	-2.101	-0.125
1946	-1.55496	2.101	-2.101	-0.4375
1947	-1.90909	2.101	-2.101	-0.25
1948	-2.71607	2.101	-2.101	-0.3125	-2.71607
1949	-0.634811	2.101	-2.101	1.75
		1869	0.148036	2.024	-2.024	0.84375
		1870	0.445136	2.024	-2.024	0.8125
		1871	0.601585	2.024	-2.024	1
		1872	0.299724	2.024	-2.024	0.09375
		1873	0.150486	2.024	-2.024	0.0625
		1874	0.150486	2.024	-2.024	0.96875
		1875	-0.299724	2.024	-2.024	-0.9375
		1876	-0.611117	2.024	-2.024	-0.96875
		1877	-1.26491	2.024	-2.024	-2
		1878	-2.24331	2.024	-2.024	-1.84375	-2.24331
		1879	-2.0448	2.024	-2.024	0	-2.0448
		1880	-1.57482	2.024	-2.024	0.0625
		1881	-1.39812	2.024	-2.024	-0.09375
		1882	-0.983245	2.024	-2.024	0.96875
		1883	-0.821314	2.024	-2.024	1.625
		1884	-0.271637	2.024	-2.024	1.71875
		1885	-0.271637	2.024	-2.024	0.375
		1886	-0.13549	2.024	-2.024	0.75
		1887	-0.138745	2.024	-2.024	0.875
		1888	-0.142551	2.024	-2.024	0.90625
		1889	0.142551	2.024	-2.024	1.625
		1890	-0.27848	2.024	-2.024	0.375
		1891	-0.842344	2.024	-2.024	-0.90625
		1892	-0.411266	2.024	-2.024	-0.3125
		1893	-0.411266	2.024	-2.024	0.0625
		1894	-0.411266	2.024	-2.024	0.90625
		1895	0.26454	2.024	-2.024	1
		1896	0.674846	2.024	-2.024	1.125
		1897	1.14967	2.024	-2.024	1.09375
		1898	2.06228	2.024	-2.024	1.90625	2.06228
		1899	1.84243	2.024	-2.024	-1.03125
		1900	1.32622	2.024	-2.024	-2
		1901	0.87178	2.024	-2.024	-1
		1902	0.855765	2.024	-2.024	0.125
		1903	1.02682	2.024	-2.024	1.67742
		1904	0.886683	2.024	-2.024	0.125
		1905	0.733443	2.024	-2.024	0.3125
		1906	0.733443	2.024	-2.024	0.96875
		1907	0.723674	2.024	-2.024	0
		1908	0.831209	2.024	-2.024	0.46875
		1909	1.10272	2.024	-2.024	1.03125
		1910	1.81849	2.024	-2.024	1.5
		1911	2.13827	2.024	-2.024	1.09375	2.13827
		1912	1.68819	2.024	-2.024	-1
		1913	1.5262	2.024	-2.024	0.46875
		1914	1.68819	2.024	-2.024	0.5
		1915	1.09943	2.024	-2.024	-1.96875
		1916	1.09834	2.024	-2.024	-0.3125
		1917	1.09834	2.024	-2.024	0.84375
		1918	0.987355	2.024	-2.024	0.875
		1919	0.987355	2.024	-2.024	-0.90625
		1920	1.0315	2.024	-2.024	-0.71875
		1921	1.65534	2.024	-2.024	1.4375
		1922	1.47781	2.024	-2.024	-0.96875
		1923	1.37081	2.024	-2.024	0.75
		1924	1.1989	2.024	-2.024	-0.84375
		1925	1.51482	2.024	-2.024	1.3125
		1926	1.70054	2.024	-2.024	-0.0967742
		1927	1.37417	2.024	-2.024	-1.1875
		1928	0.750642	2.024	-2.024	-2
		1929	-0.288044	2.024	-2.024	-2
		1930	-0.75423	2.024	-2.024	-1.03125
		1931	-0.611117	2.024	-2.024	0.9375
		1932	-0.607398	2.024	-2.024	0.09375
		1933	-0.302599	2.024	-2.024	0.6875
		1934	-0.607398	2.024	-2.024	0.3125
		1935	-0.786954	2.024	-2.024	0.46875
		1936	-1.25831	2.024	-2.024	-0.84375
		1937	-1.11046	2.024	-2.024	0.8125
		1938	-1.22676	2.024	-2.024	1.375
		1939	-1.0315	2.024	-2.024	-0.59375
